# Supplementary material for: Constraining emissions of volatile organic compounds from western US wildfires with WE-CAN and FIREX-AQ airborne observations
Source: Copernicus journal article supplement (doi:10.5194/acp-23-5969-2023), 2023-05-31
Supplement: Supplementary file 1 [file acp-23-5969-2023-supplement.pdf]

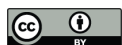

*Supplement of*

## **Constraining emissions of volatile organic compounds from western US wildfires with WE-CAN and FIREX-AQ airborne observations**

**Lixu Jin et al.**

*Correspondence to:* Lixu Jin ([lixu.jin@umontana.edu](mailto:lixu.jin@umontana.edu))

The copyright of individual parts of the supplement might differ from the article licence.

Table S1. Details of the open fires sampled in Western US during the 2018 WE-CAN campaign.

| Fire names                  | Fire locations |           | Sampling dates/times (UTC) |             | Acres burned (Acres) |
|-----------------------------|----------------|-----------|----------------------------|-------------|----------------------|
|                             | Latitude       | Longitude | Starting                   | Ending      |                      |
| Rattlesnake Creek Fire      | 45.334         | -116.396  | 07-24 19:06                | 07-25 00:56 | 2,100                |
| Carr Fire                   | 42.882         | -122.734  | 07-30 20:06                | 07-31 02:24 | 20,000               |
| South Umpqua Complex        | 42.882         | -122.734  | 07-30 20:06                | 07-31 02:24 | 13,168               |
| Taylor Creek Fire           | 42.515         | -123.583  |                            |             | 24,965               |
| Sharps Fire                 | 43.467         | -114.145  | 07-31 20:04                | 08-01 02:29 | 20,000               |
| Cougar Creek Fire           | 47.851         | -120.549  | 08-03 20:00                | 08-04 02:27 | 3,614                |
| Kiwah Fire                  | 44.823         | -115.286  |                            |             | 500                  |
| Rabbit Foot Fire            | 44.856         | -114.307  |                            |             | 600                  |
| Donnell Fire                | 38.349         | -119.929  | 08-06 19:57                | 08-07 02:15 | 11,074               |
| Ferguson Fire               | 37.652         | -119.881  |                            |             | 91,502               |
| Dollar Ridge Fire           | 40.1           | -110.96   | 08-09 18:55                | 08-10 01:45 | 59,250               |
| Coal Hollow Fire            | 39.951         | -111.403  |                            |             | 17,969               |
| Bear Trap Fire              | 39.2931        | -109.874  |                            |             | N/A                  |
| Rabbit Foot Fire            | 44.856         | -114.307  | 08-13 18:30                | 08-14 00:41 | 15,767               |
| Goldstone Fire              | 45.117         | -113.534  |                            |             | 3,769                |
| Wigwam Fire                 | 45.153         | -111.931  |                            |             | N/A                  |
| Monument Fire               | 44.968         | -111.851  |                            |             | 4,215                |
| Rabbit Foot Fire            | 44.856         | -114.307  | 08-15 20:00                | 08-16 01:56 | 26,294               |
| Beaver Creek Fire           | 45.893         | -113.528  |                            |             | 1,000                |
| Shellrock Fire              | 46.929         | -111.741  |                            |             | 300                  |
| Goldstone Fire              | 45.117         | -113.534  |                            |             | 4,000                |
| Miriam Fire                 | 46.61          | -121.35   | 08-16 17:38                | 08-16 23:25 | 2,655                |
| Sheep Creek Fire            | 40.773         | -116.842  | 08-20 19:05                | 08-21 02:14 | 40,000               |
| Mendocino Complex           | 39.24          | -123.11   | 08-20 19:05                | 08-21 02:14 | 398,862              |
| South Sugarloaf Fire        | 41.812         | -116.324  | 08-26 18:56                | 08-27 02:14 | 200,692              |
| Red Feather Prescribed Burn | 40.852         | -105.576  | 09-10 19:31                | 09-10 23:01 | 4,348                |
| Silver Creek Fire           | 40.223         | -106.655  | 09-13 19:12                | 09-13 23:29 | 5,973                |

Note: The acres burned represent the situation as of when the C-130 sampled the fire as documented in the InciWeb- Incident Information System. Details can be found in <http://catalog.eol.ucar.edu/we-can/tools/missions>.

**Table S2. Speciation of lumped VOCs from WE-CAN observations, emissions inventories, and in the GEOS-Chem model**

| Lumped VOCs                                    | Chemical formula                             | WE-CAN Observation                                                                                         | GFED4                                                              | GFAS                                                            | QFED                  |
|------------------------------------------------|----------------------------------------------|------------------------------------------------------------------------------------------------------------|--------------------------------------------------------------------|-----------------------------------------------------------------|-----------------------|
| Xylenes                                        | C <sub>8</sub> H <sub>10</sub> <sup>a</sup>  | o-Xylene, m-Xylene, and p-Xylene                                                                           | Xylenes                                                            | Xylenes                                                         | Xylenes               |
| ALK4<br>(lumped ≥ C <sub>4</sub><br>alkanes)   | C <sub>4</sub> H <sub>10</sub> <sup>b</sup>  | n-Butane and i-Butane                                                                                      | n-Butane<br>and i-Butane                                           | n-Butane and<br>i-Butane                                        | n-Butane and i-Butane |
|                                                | C <sub>5</sub> H <sub>12</sub> <sup>b</sup>  | n-Pentane and i-Pentane                                                                                    | n-Pentane<br>and i-<br>Pentane                                     | n-Pentane<br>and i-Pentane                                      | N/A                   |
| d                                              | C <sub>6</sub> H <sub>14</sub> <sup>c</sup>  | n-Hexane and 3-Methylpentane                                                                               | n-Hexane<br>and i-<br>Hexane                                       | n-Hexane and<br>i-Hexane                                        | N/A                   |
|                                                | C <sub>7</sub> H <sub>16</sub> <sup>c</sup>  | 2,4-Dimethylpentane, n-Heptane,<br>2-Methylhexane <sup>b</sup> , 3-Methylhexane,<br>2,3-Dimethylpentane    | Heptane                                                            | Heptane                                                         | N/A                   |
|                                                | C <sub>8</sub> H <sub>18</sub> <sup>c</sup>  | n-Octane, 2-Methylheptane, 2,2,4-<br>Trimethylpentane, 2,3,4-<br>Trimethylpentane, and 3-<br>Methylheptane | N/A                                                                | N/A                                                             | N/A                   |
|                                                | C <sub>9</sub> H <sub>20</sub> <sup>c</sup>  | n-Nonane                                                                                                   | N/A                                                                | N/A                                                             | N/A                   |
| PRPE<br>(lumped ≥ C <sub>3</sub><br>alkenes)   | C <sub>3</sub> H <sub>6</sub> <sup>c</sup>   | Propene                                                                                                    | Propene                                                            | Propene                                                         | Propene               |
|                                                | C <sub>4</sub> H <sub>8</sub> <sup>b</sup>   | Butenes                                                                                                    | 1-Butene, i-<br>Butene,<br>trans-2-<br>Butene, and<br>cis-2-Butene | 1-Butene, i-<br>Butene, trans-<br>2-Butene, and<br>cis-2-Butene | N/A                   |
|                                                | C <sub>5</sub> H <sub>10</sub> <sup>a</sup>  | Pentenenes and Methylbutenes                                                                               | 1-Pentene<br>and 2-<br>Pentene                                     | 1-Pentene and<br>2-Pentene                                      | N/A                   |
|                                                | C <sub>6</sub> H <sub>12</sub>               | N/A                                                                                                        | Hexene                                                             | Hexene                                                          | N/A                   |
|                                                | C <sub>8</sub> H <sub>16</sub>               | N/A                                                                                                        | Octene                                                             | Octene                                                          | N/A                   |
| RCHO<br>(lumped ≥ C <sub>3</sub><br>aldehydes) | C <sub>3</sub> H <sub>6</sub> O <sup>b</sup> | Propanal                                                                                                   | N/A                                                                | N/A                                                             | N/A                   |
|                                                | C <sub>4</sub> H <sub>8</sub> O <sup>b</sup> | Butanal                                                                                                    | N/A                                                                | N/A                                                             | N/A                   |

<sup>a</sup> Using observations from the proton-transfer reaction time-of-flight mass spectrometer (PTR-ToF-MS).

<sup>b</sup> Using observations from the trace organic gas analyzer (TOGA).

<sup>c</sup> Using observations from the advanced whole air sampler (AWAS).

Table S3. Location and elevation of nine ground sites

| Site location                             | Longitude | Latitude |
|-------------------------------------------|-----------|----------|
| Seattle, WA                               | -122.31   | 47.57    |
| Boise, ID                                 | -116.35   | 43.60    |
| Denver, CO                                | -105.01   | 39.78    |
| Stockton, CA                              | -121.27   | 37.95    |
| Fresno, CA                                | -119.77   | 36.79    |
| Reno, NV                                  | -119.81   | 39.53    |
| Chico, CA                                 | -121.84   | 39.76    |
| Missoula, MT                              | -113.99   | 46.86    |
| Mt. Bachelor Observatory, OR <sup>a</sup> | -121.68   | 43.98    |

<sup>a</sup> The Mt. Bachelor Observatory (MBO) located at Deschutes, OR is a mountaintop site with an elevation of approximately 2.8 km.

Table S4. FIREX-AQ observations used in this analysis.

| Formula                                           | GEOS-Chem Species             | Full Name                         | Instruments               | Reported Uncertainty |
|---------------------------------------------------|-------------------------------|-----------------------------------|---------------------------|----------------------|
| C <sub>2</sub> H <sub>6</sub>                     | C <sub>2</sub> H <sub>6</sub> | Ethane                            | CAMS                      | 2 %                  |
| C <sub>3</sub> H <sub>8</sub>                     | C <sub>3</sub> H <sub>8</sub> | Propane                           | <b>TOGA</b>               | 15 %                 |
| -                                                 | ALK4                          | Lumped ≥ C <sub>4</sub> Alkanes   | WAS                       | 10 %                 |
| -                                                 | PRPE                          | Lumped ≥ C <sub>3</sub> Alkenes   | WAS                       | 10 %                 |
| CH <sub>2</sub> O                                 | HCHO                          | Formaldehyde                      | <b>CAMS/ISAF</b>          | 6 %                  |
| CH <sub>3</sub> CHO                               | ALD2                          | Acetaldehyde                      | <b>NOAA PTR/TOGA</b>      | 15 %                 |
| -                                                 | RCHO                          | Lumped ≥ C <sub>3</sub> Aldehydes | <b>TOGA</b>               | 30 %                 |
| C <sub>6</sub> H <sub>6</sub>                     | BENZ                          | Benzene                           | <b>NOAA PTR/TOGA</b>      | 15 %                 |
| C <sub>7</sub> H <sub>8</sub>                     | TOLU                          | Toluene                           | <b>NOAA PTR/TOGA</b>      | 15 %                 |
| C <sub>8</sub> H <sub>10</sub>                    | XYLE                          | Xylenes                           | <b>NOAA PTR/TOGA</b>      | 15 %                 |
| C <sub>3</sub> H <sub>6</sub> O                   | ACET                          | Acetone                           | <b>NOAA PTR/TOGA</b>      | 15 %                 |
| CH <sub>3</sub> C(O)C <sub>2</sub> H <sub>5</sub> | MEK                           | Methyl Ethyl Ketone               | <b>NOAA PTR/TOGA</b>      | 15 %                 |
| HCOOH                                             | HCOOH                         | Formic acid                       | <b>NOAA PTR/NOAA CIMS</b> | 30%                  |
| C <sub>2</sub> H <sub>4</sub> O <sub>2</sub>      | ACTA                          | Acetic acid                       | <b>NOAA PTR</b>           | 15 %                 |

Notes: We applied 0.78/0.22 and 0.65/0.35 ratios to the PTR-ToF-MS measurement to distinguish the isomers of acetone/propanal, and xylenes/ethylbenzene as we did in the WE-CAN. Measurements used for figures in Section 4 are in bold text.

Table S5. Model evaluation metrics of ground measurement sites for July-September 2018

| Site             | MB (base) | MB (3 × GFAS) | RMSE (base) | RMSE (3 × GFAS) | <i>r</i> (base) | <i>r</i> (3 × GFAS) |
|------------------|-----------|---------------|-------------|-----------------|-----------------|---------------------|
| Seattle, WA      | 141.25    | 250.46        | 221.1       | 557.9           | 0.78            | 0.74                |
| Boise, ID        | -118      | <b>-40.63</b> | 129.4       | <b>128.3</b>    | 0.74            | 0.74                |
| Missoula, MT     | -96.94    | <b>-19.7</b>  | 115.2       | <b>104</b>      | 0.83            | <b>0.84</b>         |
| Mt. Bachelor, OR | -107.7    | <b>-85.04</b> | 160         | <b>142.3</b>    | 0.55            | 0.5                 |
| Reno, NV         | -88.78    | <b>-28.85</b> | 120         | <b>90.89</b>    | 0.67            | 0.65                |
| Denver, CO       | -34.97    | <b>6.55</b>   | 54.44       | 85.91           | 0.72            | 0.66                |
| Chico, CA        | -117      | <b>30.93</b>  | 141.3       | 224.6           | 0.71            | 0.69                |
| Stockton, CA     | -94.96    | <b>-7.65</b>  | 133.1       | 240.9           | 0.39            | 0.36                |
| Fresno, CA       | -142      | <b>-65.74</b> | 174.8       | <b>166.2</b>    | 0.52            | 0.48                |

Note: The 3 × GFAS run metrics are in bold text when it performs better than base run (GFAS). The units for MB (mean bias) and RMSE (root-mean-square error) are ppb, and *r* is unitless.

Table S6. Model evaluation metrics of ground measurement sites for the BB-impacted days in July-September 2018

| Site             | MB (base) | MB (3 × GFAS) | RMSE (base) | RMSE (3 × GFAS) | <i>r</i> (base) | <i>r</i> (3 × GFAS) |
|------------------|-----------|---------------|-------------|-----------------|-----------------|---------------------|
| Seattle, WA      | 370.48    | 1041.36       | 501.45      | 1453.73         | 0.74            | 0.7                 |
| Boise, ID        | -116.68   | <b>7.07</b>   | 131.02      | 136.08          | 0.75            | 0.74                |
| Missoula, MT     | -118.8    | <b>-0.29</b>  | 133.96      | <b>121.15</b>   | 0.81            | <b>0.83</b>         |
| Mt. Bachelor, OR | -134.36   | <b>-93.33</b> | 187.81      | <b>160.96</b>   | 0.51            | 0.44                |
| Reno, NV         | -114.3    | <b>-4.97</b>  | 152.55      | <b>111.3</b>    | 0.55            | 0.51                |
| Denver, CO       | -21.72    | 143.41        | 66.74       | 199.66          | 0.7             | 0.48                |
| Chico, CA        | -123.22   | <b>69.12</b>  | 151.55      | 255.4           | 0.65            | 0.62                |
| Stockton, CA     | -98.85    | <b>37.63</b>  | 153.78      | 311.75          | 0.23            | 0.21                |
| Fresno, CA       | -169.59   | <b>-38.59</b> | 210.77      | <b>201.91</b>   | 0.32            | 0.28                |

Note: The 3 × GFAS run metrics are in bold text when it performs better than base run (GFAS). The units for MB (mean bias) and RMSE (root-mean-square error) are ppb, and correlation *r* is unitless.

Table S7. Model evaluation metrics of ground measurement sites for the least BB-impacted days in July-September 2018

| Site             | MB (base) | MB (3 × GFAS)  | RMSE (base) | RMSE (3 × GFAS) | <i>r</i> (base) | <i>r</i> (3 × GFAS) |
|------------------|-----------|----------------|-------------|-----------------|-----------------|---------------------|
| Seattle, WA      | 104.78    | 124.64         | 129.02      | 156.49          | 0.66            | <b>0.77</b>         |
| Boise, ID        | -119.9    | <b>-106.51</b> | 127.18      | <b>116.76</b>   | 0.25            | <b>0.27</b>         |
| Missoula, MT     | -61.28    | <b>-51.39</b>  | 75.02       | <b>67.16</b>    | 0.56            | 0.45                |
| Mt. Bachelor, OR | -67.75    | -72.61         | 105.44      | 108.47          | 0.16            | <b>0.21</b>         |
| Reno, NV         | -64.18    | <b>-51.88</b>  | 76.45       | <b>65.45</b>    | 0.4             | <b>0.46</b>         |
| Denver, CO       | -37.23    | <b>-16.75</b>  | 52.05       | <b>43.01</b>    | 0.63            | <b>0.68</b>         |
| Chico, CA        | -98.88    | <b>-80.94</b>  | 105.57      | <b>84.24</b>    | 0.83            | <b>0.89</b>         |
| Stockton, CA     | -89.94    | <b>-66.14</b>  | 100.21      | <b>86.2</b>     | 0.79            | 0.63                |
| Fresno, CA       | -108.82   | <b>-98.33</b>  | 117.79      | <b>108.7</b>    | 0.81            | 0.53                |

Note: The 3 × GFAS run metrics are in bold text when it performs better than base run (GFAS). The units for MB and RMSE are ppb, and correlation *r* is unitless.

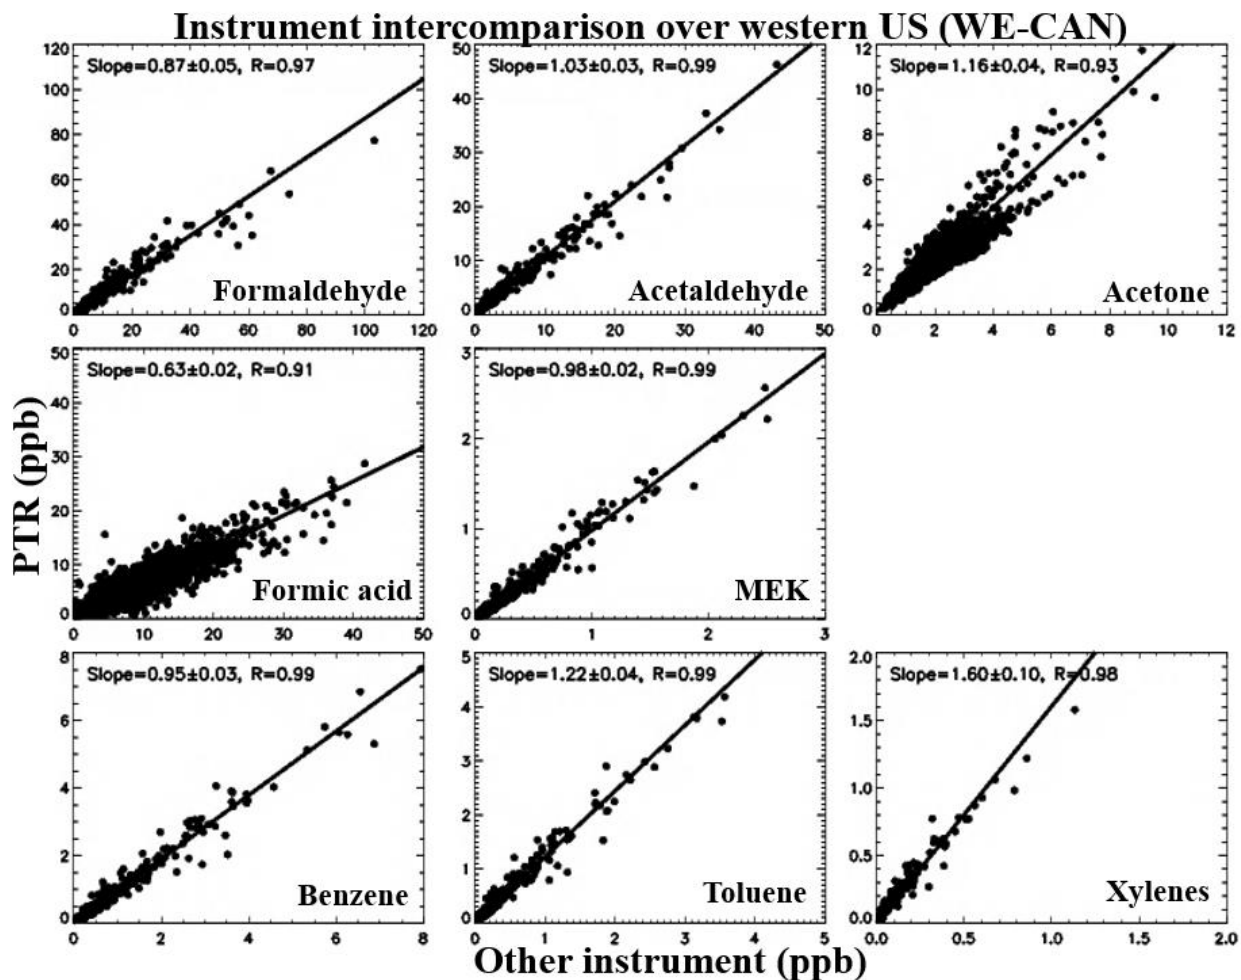

Figure S1a. Instrument intercomparison of VOC mixing ratios in the western US made on the NSF/NCAR C-130 aircraft during WE-CAN. PTR-ToF-MS is compared to co-deployed I-CIMS measurements for formic acid and TOGA for remaining VOCs. Observations are averaged over the corresponding sampling period of the TOGA instrument (using TOGA merge data files at [https://www-air.larc.nasa.gov/cgi-bin/ArcView/firexaq?MERGE=1#TOGA.C130\\_MRG/](https://www-air.larc.nasa.gov/cgi-bin/ArcView/firexaq?MERGE=1#TOGA.C130_MRG/)). The acetone in TOGA is compared to 0.78 times PTR acetone + propanal measurements. The MEK in TOGA is compared to 0.8 times PTR MEK + butanal measurements. The sum of m-, o-, p-xylenes in TOGA is compared to 0.65 times PTR C<sub>8</sub> aromatics. Details are in Table 1.



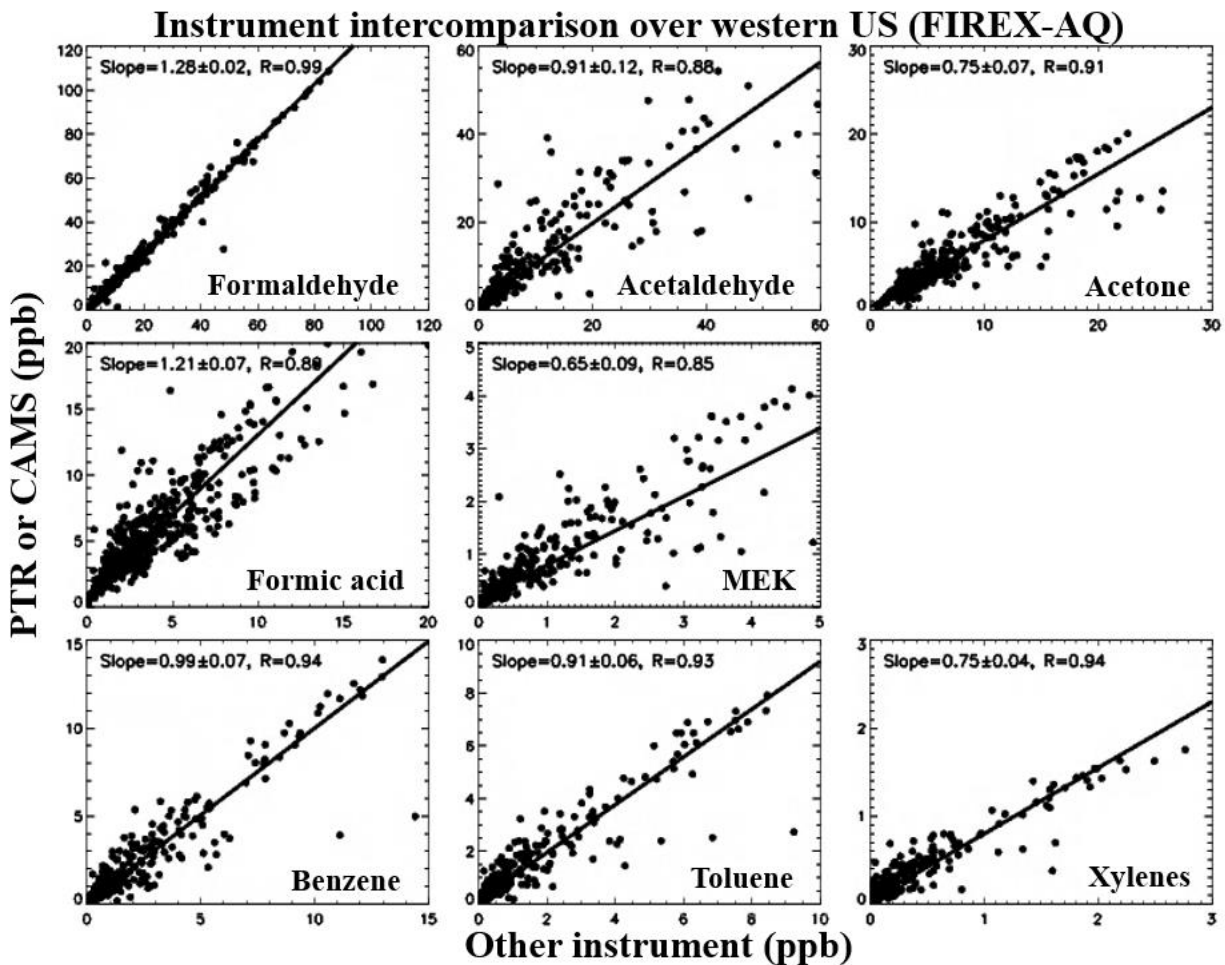

Figure S1b. Instrument intercomparison of VOC mixing ratios in the western US made on the NASA DC-8 aircraft during FIREX-AQ. CAMS (Compact Atmospheric Multispecies Spectrometer) is compared to co-deployed ISAF (In Situ Airborne Formaldehyde) for formaldehyde. PTR-ToF-MS is compared to co-deployed NOAA I-CIMS measurements for formic acid, and TOGA for remaining VOCs. Observations are averaged over the corresponding sampling period of the TOGA instrument (using TOGA merge data files at [https://www-air.larc.nasa.gov/cgi-bin/ArcView/firexaq?MERGE=1#TOGA.DC8\\_MRG/](https://www-air.larc.nasa.gov/cgi-bin/ArcView/firexaq?MERGE=1#TOGA.DC8_MRG/)). The acetone in TOGA is compared to 0.78 times PTR acetone + propanal measurements. The MEK in TOGA is compared to 0.8 times PTR MEK + butanal measurements. The sum of m-, o-, p-xylenes in TOGA is compared to 0.65 times PTR C<sub>8</sub> aromatics. Details are in Table 1.

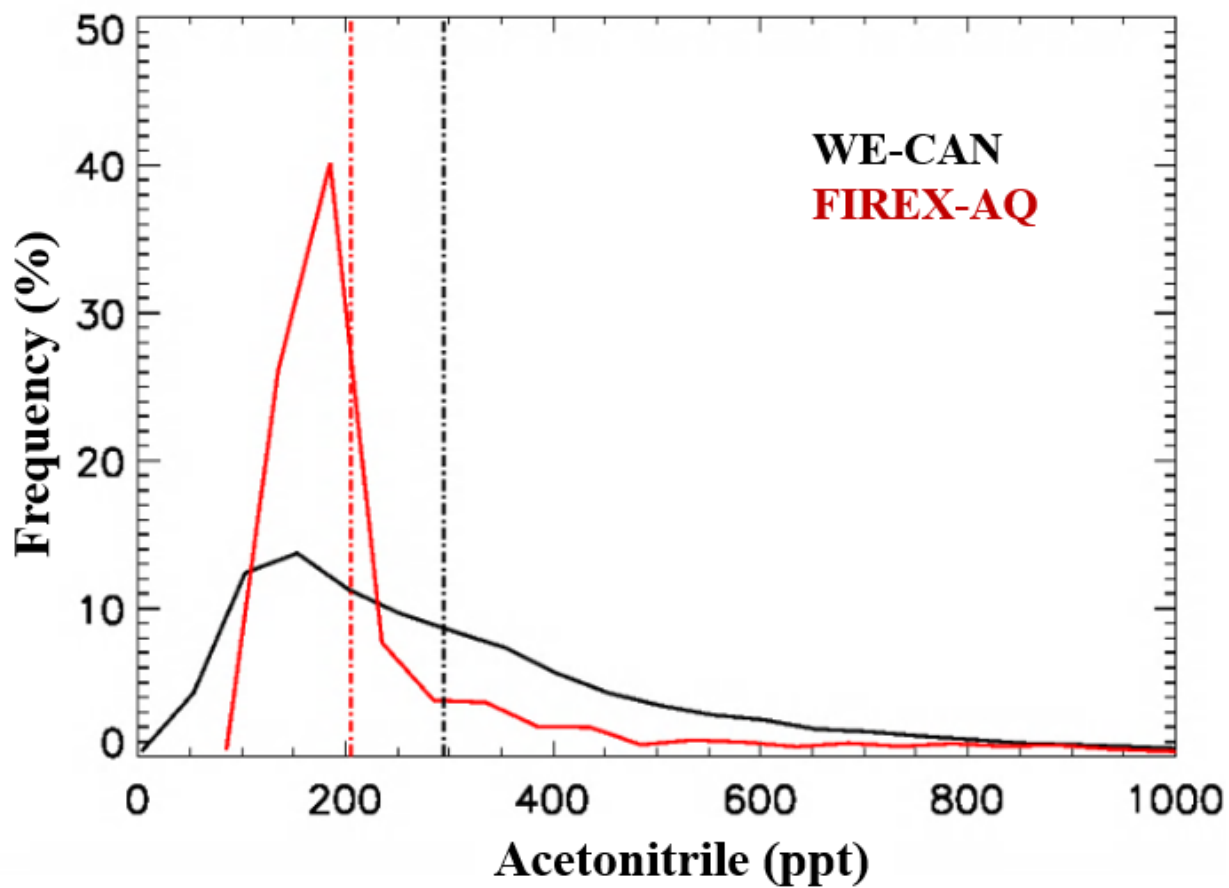

Figure S2. Comparison of observed acetonitrile histograms across fire-influenced campaigns for the western US (WE-CAN in black and FIREX-AQ in red). Vertical dashed lines mark the median for each campaign.

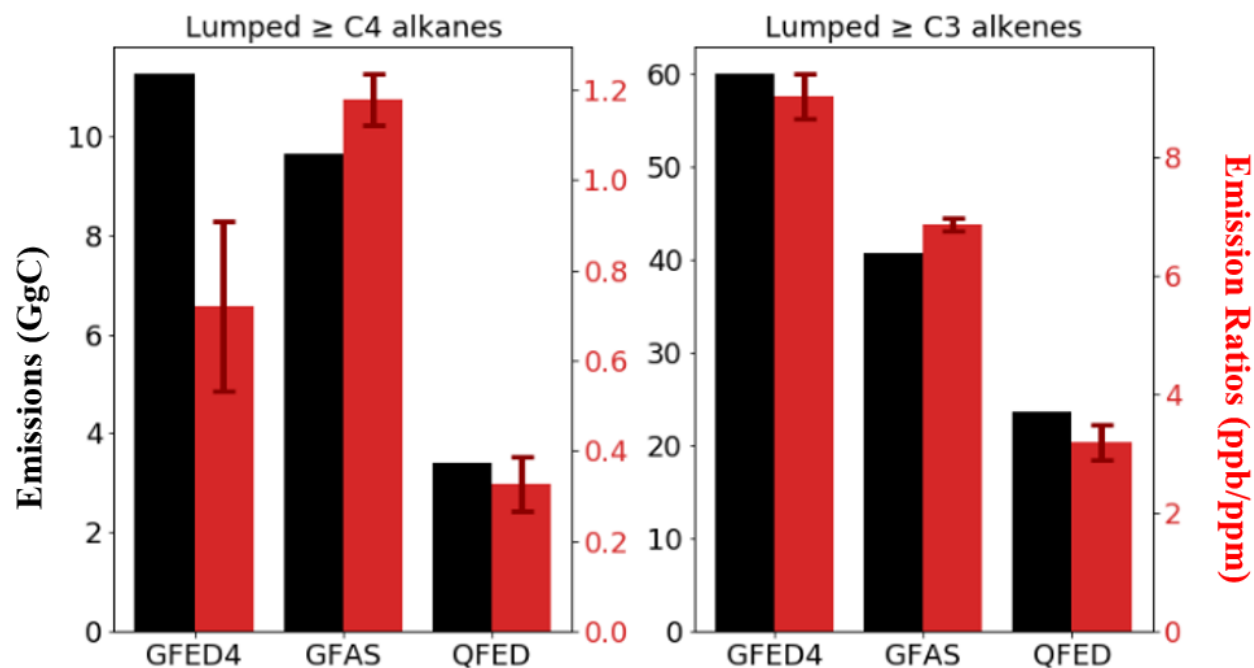

Figure S3. Biomass burning VOC emission estimates for the 2018 fire season (JJAS) (black) and emission ratios (red) with error bar (dark red) over the western US in 3 global emission inventories for lumped  $\geq$  C4 alkanes and lumped  $\geq$  C3 alkenes. The emission ratios are regionally averaged from each inventory and are calculated from the regression of VOC and CO emission estimates, with error bars representing 95 % confidence interval from the bootstrapping resampling of the regression.

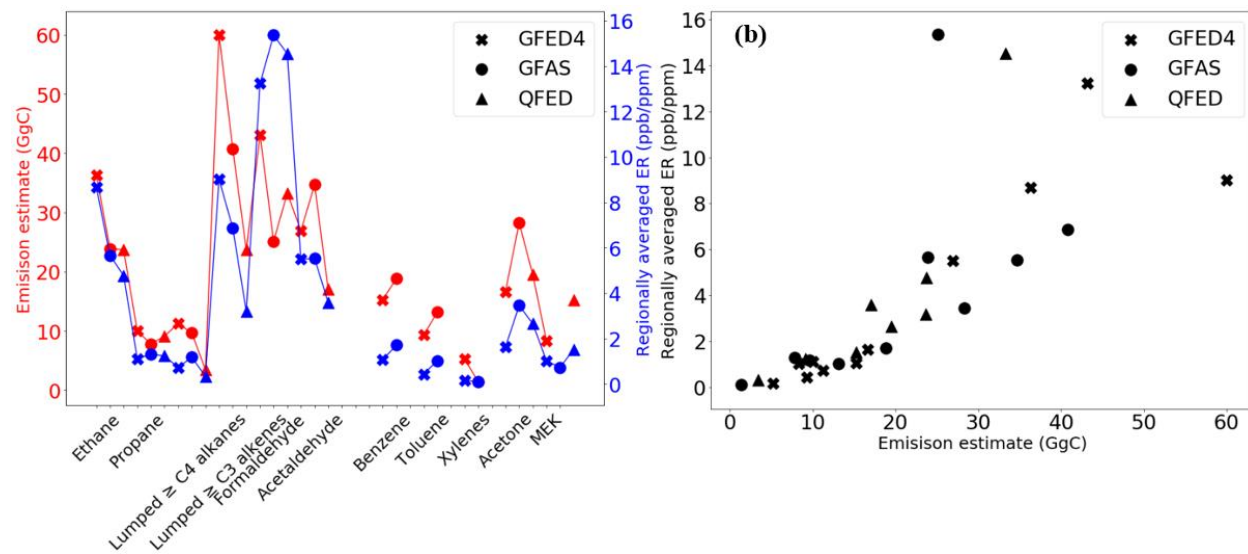

Figure S4. (a) VOC BB emission estimates and regionally averaged emission ratios relative to CO across three BB emission inventories in the western US in 2018 summer. Different symbols represent data from different inventories. (b) The scatterplots of emission estimates and regionally averaged emission ratios across three BB emission inventories using the same data from Panel a) and Figure 2.

## VOC vertical profiles over western US (WE-CAN)

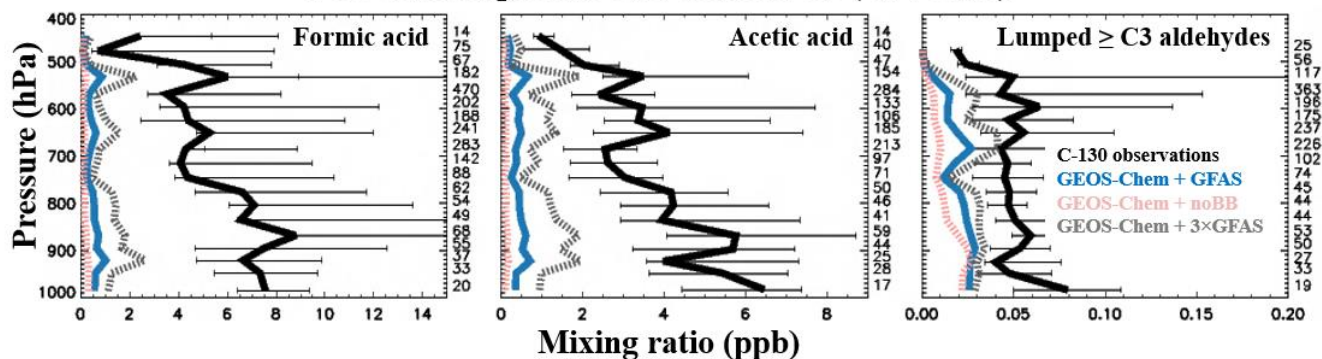

5 Figure S5. Median vertical profiles of VOC mixing ratios (formic acid, acetic acid, and lumped  $\geq$  C3 aldehydes) in the western US during the WE-CAN aircraft campaign (July-September 2018). GEOS-Chem simulation driven by GFAS is compared to observations. Also shown are two model sensitivity tests with biomass burning emission turned off (noBB) and with tripling GFASv1.2 emission ( $3 \times$  GFAS). Model results are sampled along the flight tracks at the time of flights; and observations are regridded to model resolution. Profiles are binned to the nearest 30 hPa. Horizontal bars show the 25<sup>th</sup>-75<sup>th</sup> percentile range of measurements in each vertical bin. The number of observations in each bin is given on the right side of each panel.

# CO vertical profiles over western US (low/no smoke for WE-CAN)

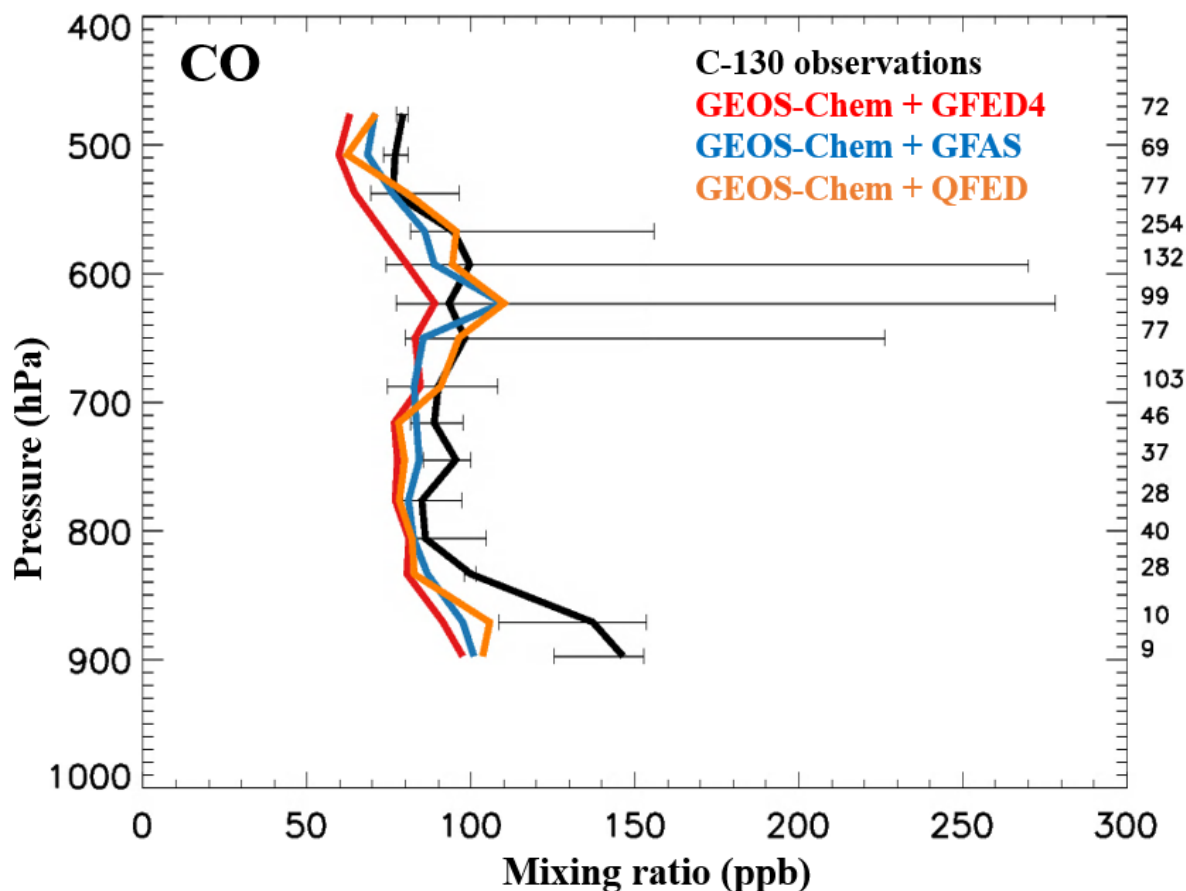

10

Figure S6. Median vertical profiles of CO mixing ratios in the western US for low/no smoke conditions in the WE-CAN aircraft campaign. GEOS-Chem simulations driven by three different biomass burning emission inventories (GFED4s, GFASv1.2, and QFED2.4) are compared to observations. Results are filtered to include only data coincident with the bottom 25th percentile of observed acetonitrile, where EnRs of CH<sub>3</sub>CN to CO larger than 2.01 ppb ppm<sup>-1</sup>, and where the number of datapoints are larger than 5. Model results are also sampled along the flight tracks at the time of flights; and observations are regridded to model resolution. Profiles are binned to the nearest 30 hPa. Horizontal bars show the 25<sup>th</sup> -75<sup>th</sup> percentile range of measurements in each vertical bin. The number of observations in each bin is given on the right side of each panel.

15

## VOC vertical profiles over western US (WE-CAN)

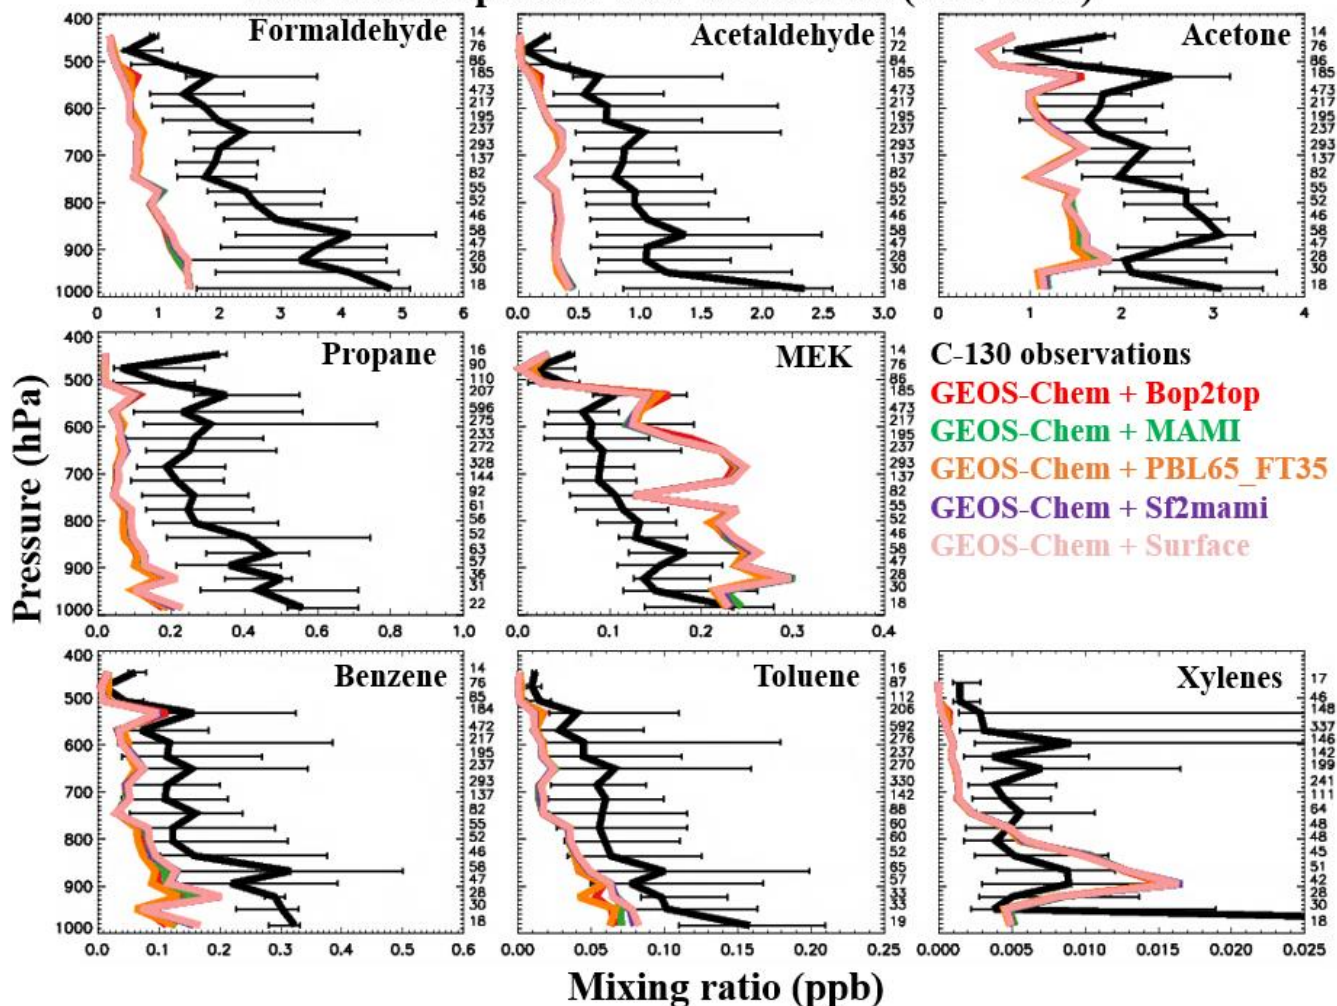

- 20 Figure S7. The median vertical concentration profiles of 8 VOCs observed during WE-CAN (black, solid) over the western US. Also shown are GEOS-Chem simulations driven by GFASv1.2 in five injection schemes: 1) releasing BB emissions evenly from bottom of the plume to the top of the plume (Bop2top, red); 2) emitting BB at the mean altitude of maximum injection (MAMI, green); 3) emitting 65% of BB emissions into planetary boundary layer and 35% into free troposphere (PBL65FT35, orange); 4) emitting BB evenly from the surface to the mean altitude of maximum injection (Sf2mami, purple); 5) emitting BB at surface (Surface, pink).

25

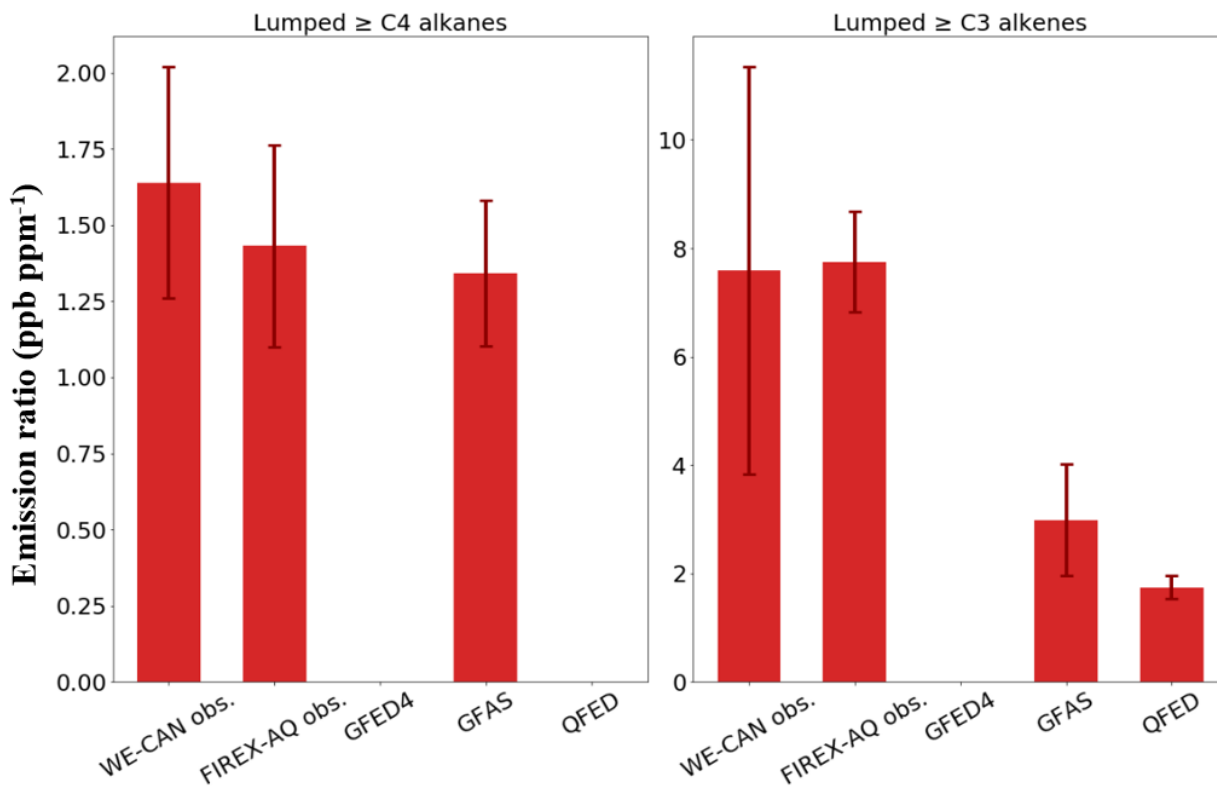

Figure S8. Biomass burning VOC emission ratios for western US wildfires observed on the C-130 during WE-CAN and the DC-8 during FIREX-AQ. Also shown are the emission ratios in GEOS-Chem simulations driven by three different BB emission inventories. Model results are sampled along the flight tracks at the time of flights every 1 minute; and observations (and model outputs) are regridded to model resolution (5 minutes and  $0.25^\circ \times 0.3125^\circ$ ). Emission ratios are calculated from the reduced major axis regression (RMA) of VOC and CO, with error bars representing the 95% confidence interval from the bootstrapping resampling of the regression. Values of zero indicate the species were either not included in the BB emission inventory in the standard GEOS-Chem or the ER calculation fails to reach the statistical threshold ( $R^2 < 0.4$ ) in the RMA regression..

30

### Toluene vs Benzene over western US (WE-CAN and FIREX-AQ)

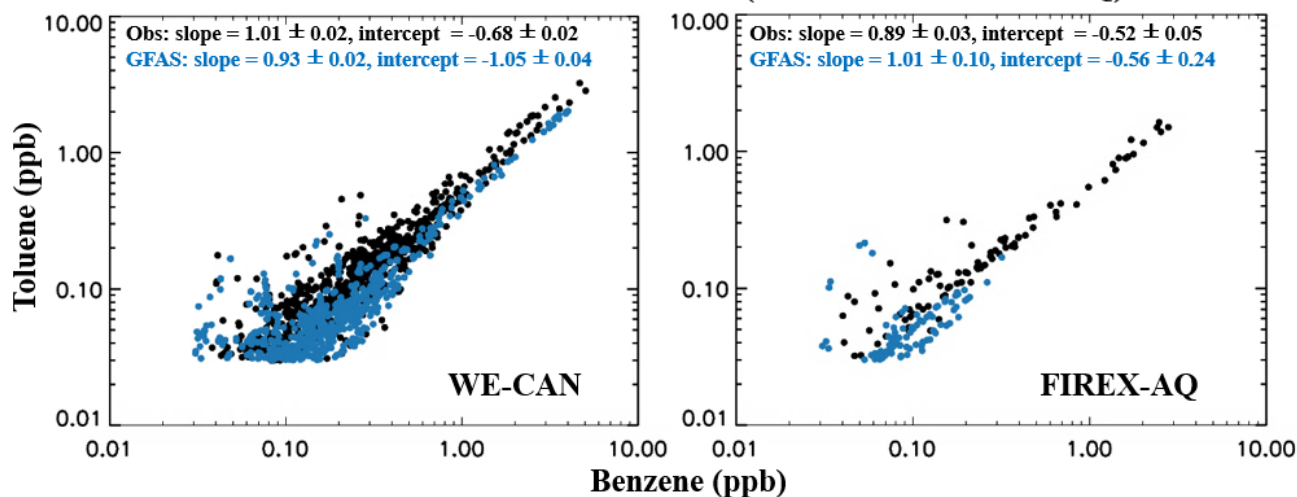

35

Figure S9. Relationship between benzene and toluene in the western US during WE-CAN (left) and FIREX-AQ (right). Data are plotted on a log-log scale, with observations in black and corresponding GEOS-Chem + GFAS simulations in blue. Model results are sampled along the flight tracks at the time of flights; and both the observations and the model outputs are regridded to model resolution (5 min and  $0.25^\circ \times 0.3125^\circ$ ). The regression parameters shown represent the best fit of the data using the reduced major axis regression, corresponding to the relationship between  $\log_{10}(\text{benzene})$  and  $\log_{10}(\text{toluene})$ . The regression parameters are derived when both benzene and toluene are above the LoD of 30 ppt.

40

### VOC vertical profiles over western US (FIREX-AQ)

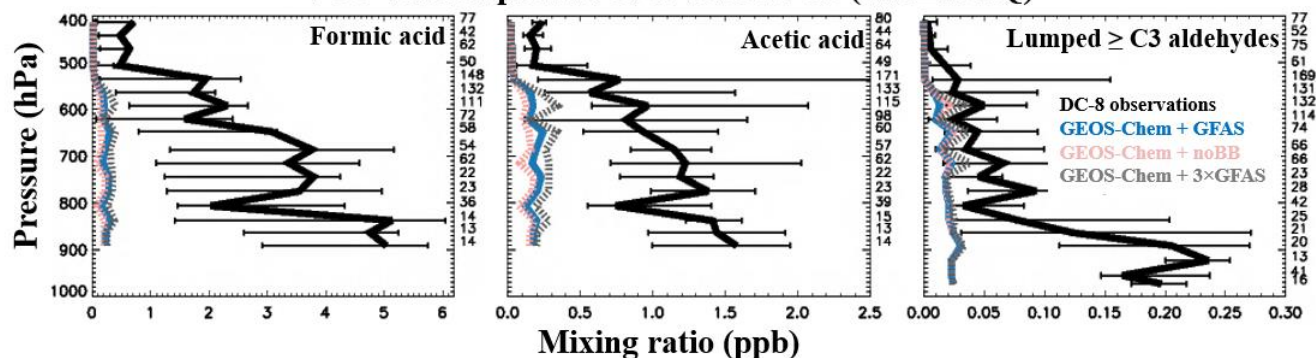

Figure S10. Median vertical profiles of three observed VOC mixing ratios in the western US during the FIREX-AQ aircraft campaign (July-September 2019). GEOS-Chem driven by GFASv1.2 is compared to observations. Also shown are two model sensitivity tests with biomass burning emission turned off (noBB) and with tripling GFASv1.2 emission ( $3 \times$  GFAS). Model results are sampled along the flight tracks at the time of flights; and both the observations and model outputs are regridded to the model resolution. Profiles are binned to the nearest 30 hPa. Horizontal bars show the 25<sup>th</sup>-75<sup>th</sup> percentile range of measurements in each vertical bin. The number of observations in each bin is given on the right side of each panel. Results are filtered to include only data where the number of datapoints for the pressure bin is larger than 10.

45



## VOC vertical profiles over western US (FIREX-AQ)

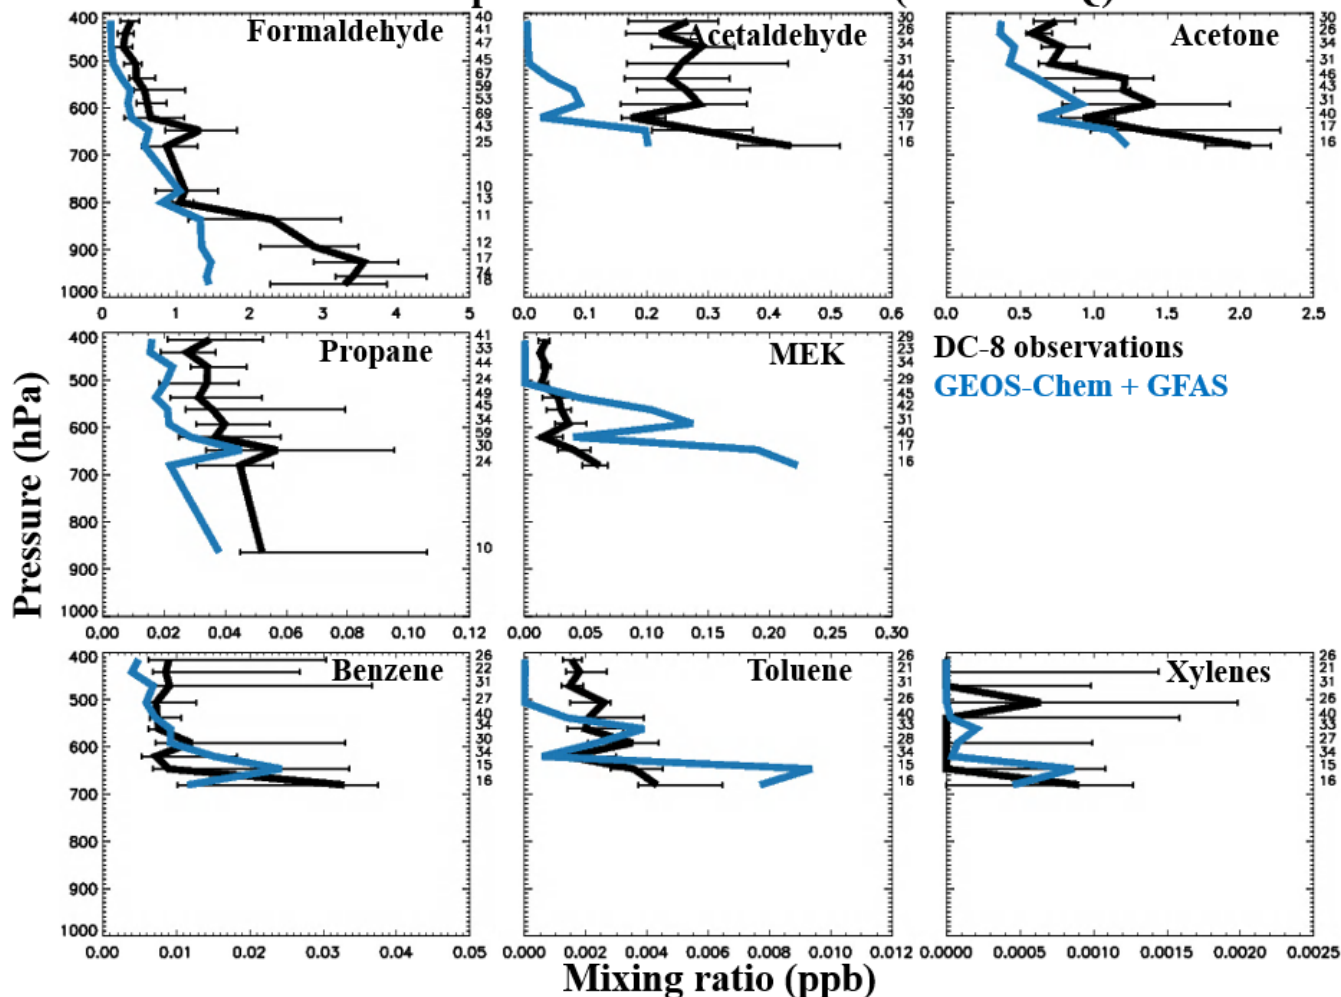

50

Figure S11. Median vertical profiles of observed VOC mixing ratios in the western US for low/no smoke conditions sampled in FIREX-AQ. Observations are compared to GEOS-Chem simulation driven by GFASv1.2. Results are filtered to include only data coincident with the bottom 25<sup>th</sup> percentile of observed acetonitrile, where  $\Delta\text{CH}_3\text{CN}/\Delta\text{CO}$  larger than 2.01 ppb ppm<sup>-1</sup>, and where the number of datapoints of each pressure bin are larger than 5. Model results are also sampled along the flight tracks at the time of flights; and both observations and model outputs are regridded to model resolution. Profiles are binned to the nearest 30 hPa. Horizontal bars show the 25th-75th percentile range of measurements in each vertical bin. The number of observations in each bin is given on the right side of each panel.

55
